# Supplementary material for: The Histamine 3 Receptor Is Expressed in the Heart and Its Activation Opposes Adverse Cardiac Remodeling in the Angiotensin II Mouse Model
Source: MDPI journal article supplement (doi:10.3390/ijms21249757), 2020-12-21
Supplement: s1 [file s1]

## **Supplementary Materials**

### **The Histamine 3 Receptor is Expressed in the Heart and its Activation Opposes Adverse Cardiac Remodeling in the Angiotensin II Mouse Model**

Samuel L. McCaffrey<sup>1,2</sup>, Grace Lim<sup>1</sup>, Martyn Bullock<sup>1</sup>, Ainsley O. Kasparian<sup>1,3</sup>, Roderick Clifton-Bligh<sup>1</sup>, William B. Campbell<sup>4</sup>, Alexander Widiapradja<sup>1,2</sup>, Scott P. Levick<sup>\*1,2</sup>

<sup>1</sup>Kolling Institute of Medical Research, Royal North Shore Hospital, St Leonards, Australia

<sup>2</sup>Faculty of Medicine and Health, The University of Sydney, Sydney, Australia

<sup>3</sup>School of Life Sciences, University of Technology Sydney, Sydney, Australia

<sup>4</sup>Pharmacology and Toxicology, Medical College of Wisconsin, Milwaukee, USA

**Short Title:** Histamine 3 Receptor and Cardiac Remodeling

**Corresponding Author:**

Scott P. Levick, Ph.D., FAHA

Faculty of Medicine and Health

The University of Sydney

Kolling Institute of Medical Research

St Leonards, NSW 2006

Telephone: +61 2 99264911

Email: [scott.levick@sydney.edu.au](mailto:scott.levick@sydney.edu.au)

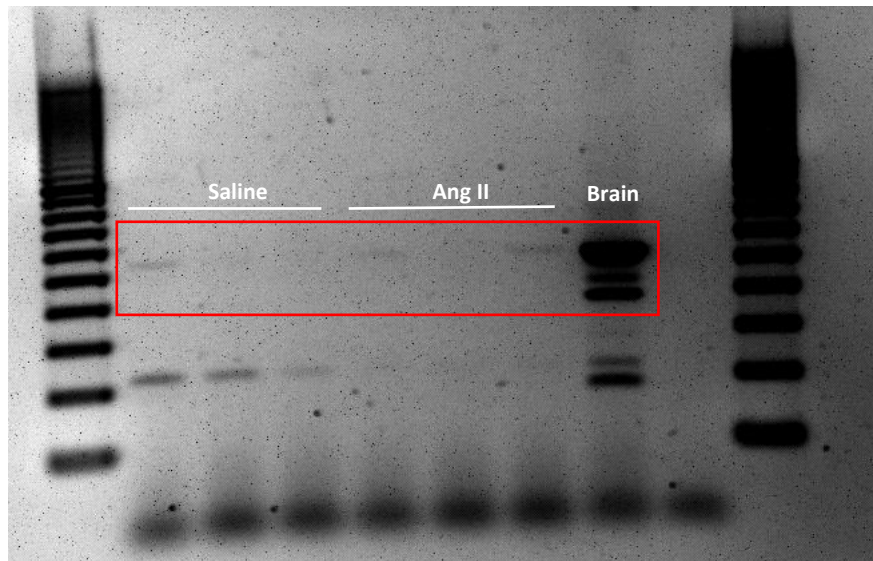

**Figure S1.** Full PCR gel that appears in cropped form in Figure 1A. Shows the ~530 bp product for the left ventricle from Saline and Ang II-infused mice, as well as the ~530, 430 and 400 bp products for the mouse brain (red box).

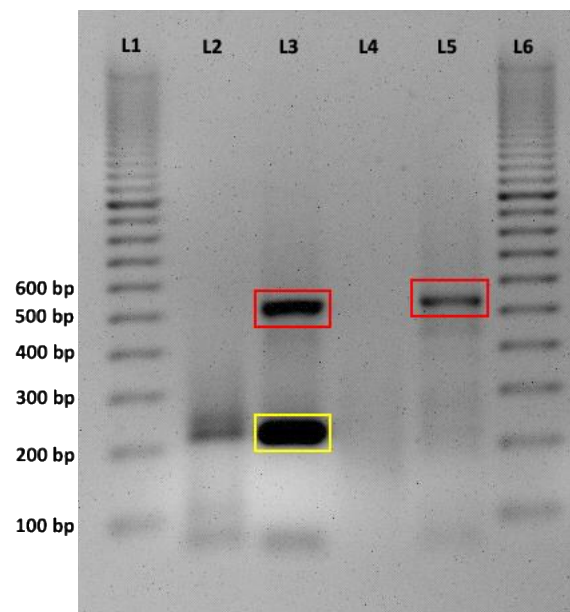

**Figure S2.** Full PCR gel showing the ~530 bp product (red box) from the Ang II LV (L3) and brain (L5) that were subsequently purified and identified by Sanger sequencing as a 99% match for the mouse H<sub>3</sub>R. The ~200 bp product (yellow box) from the LV was also purified, sequenced and identified as a 98% match for mouse endoplasmic reticulum chaperone SIL1 homolog. L1 = ladder, L2 = saline LV, L4 = empty, L6 = ladder.

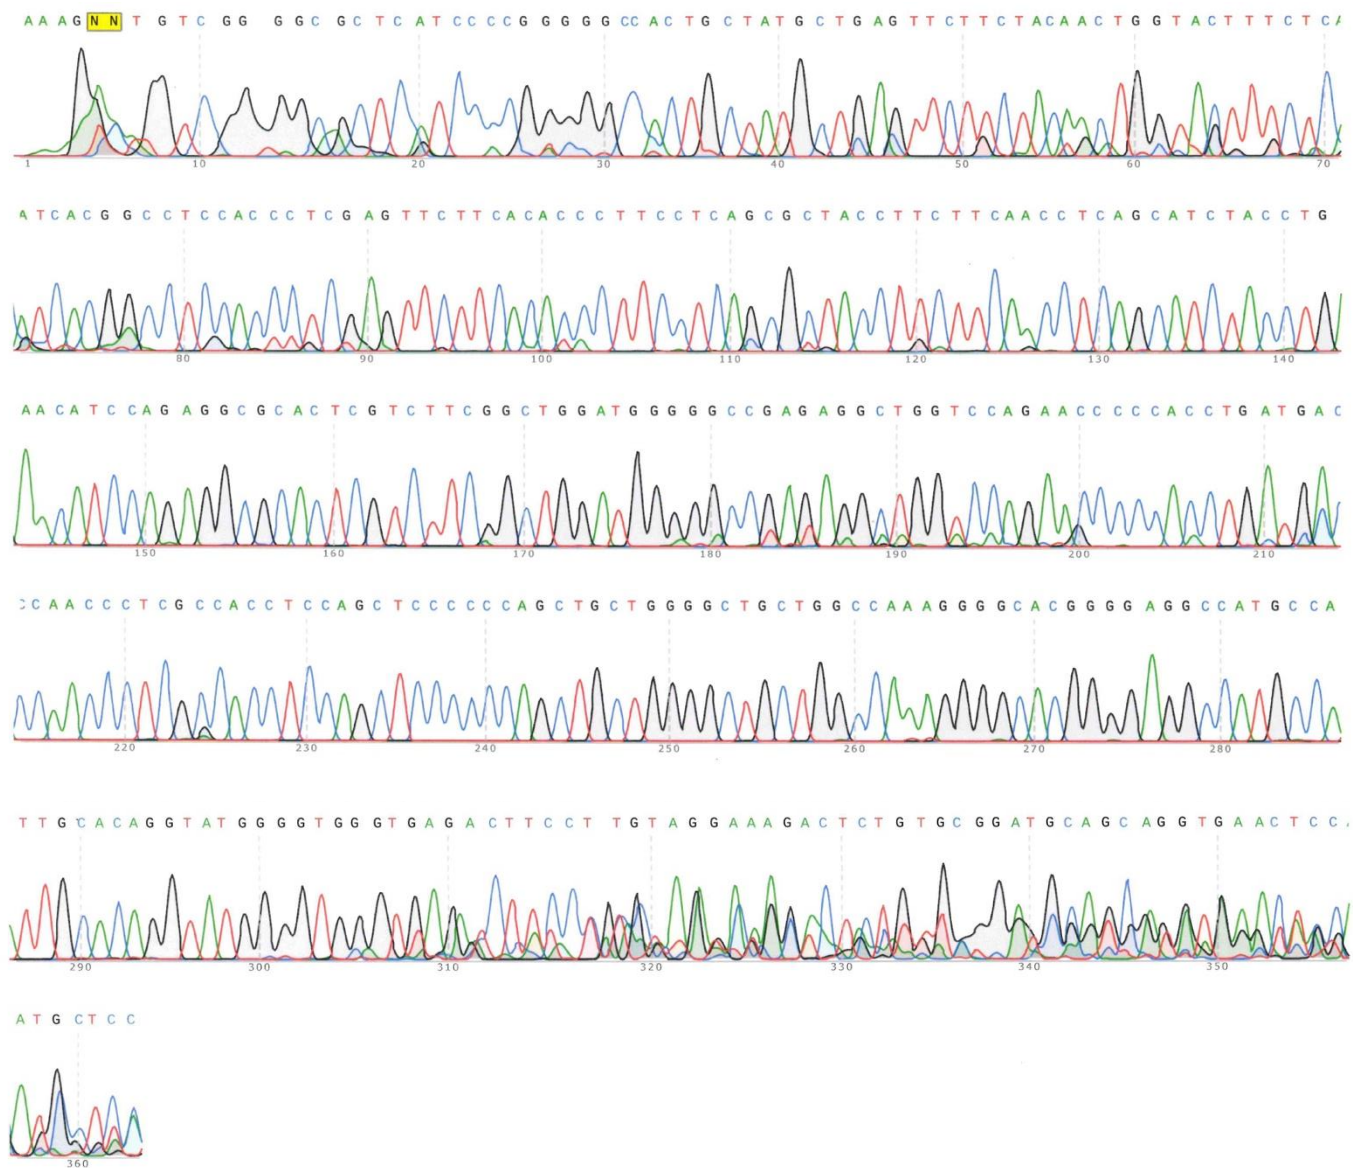

**Figure S3. (A)** Electrophoretogram identifying the amplicon of the 530 bp PCR product identified as a 99% match for *mus musculus histamine 3 receptor* – forward primer.

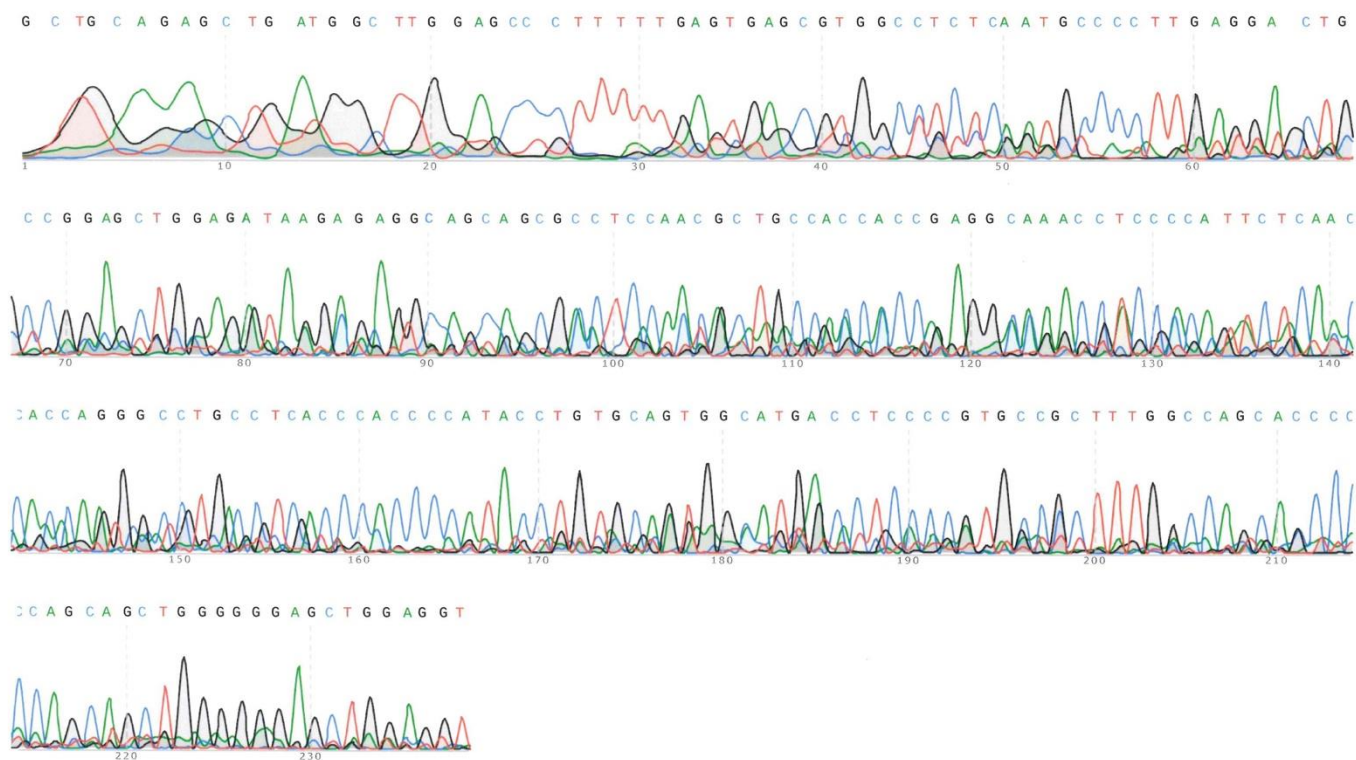

**Figure S3. (B)** Electrophoretogram identifying the amplicon of the 530 bp PCR product identified as a 99% match for *mus musculus histamine 3 receptor* – reverse primer.



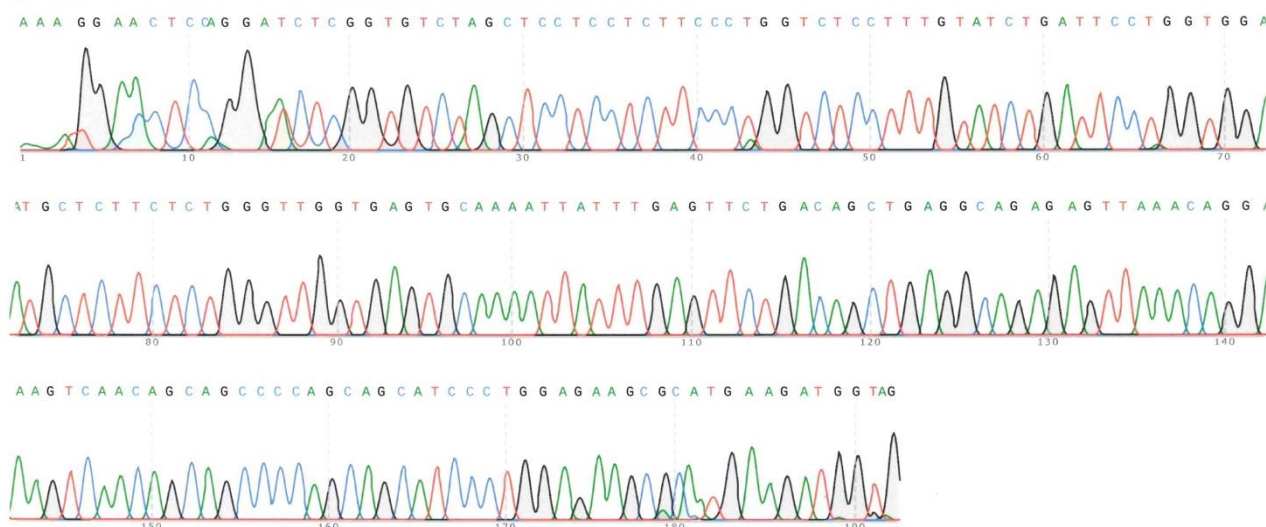

**Figure S3. (C)** Electrophoretogram identifying the amplicon of the 200 bp PCR product identified as a 98% match for *mus musculus* endoplasmic reticulum chaperone *SIL1* homolog – forward primer.

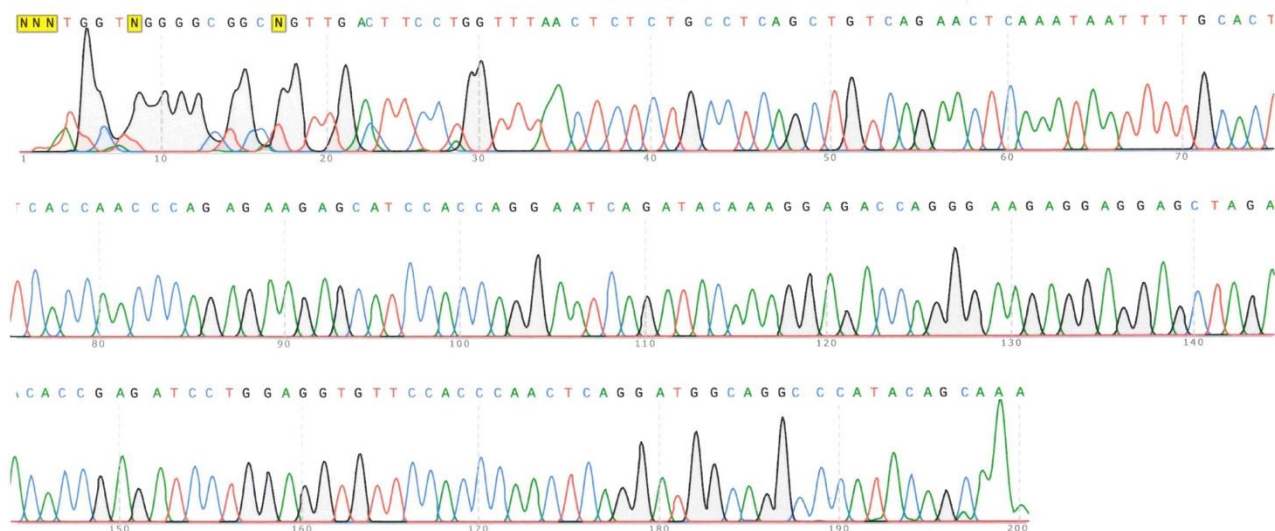

**Figure S3. (D)** Electrophoretogram identifying the amplicon of the 200 bp PCR product identified as a 98% match for *mus musculus* endoplasmic reticulum chaperone *SIL1* homolog – reverse primer.

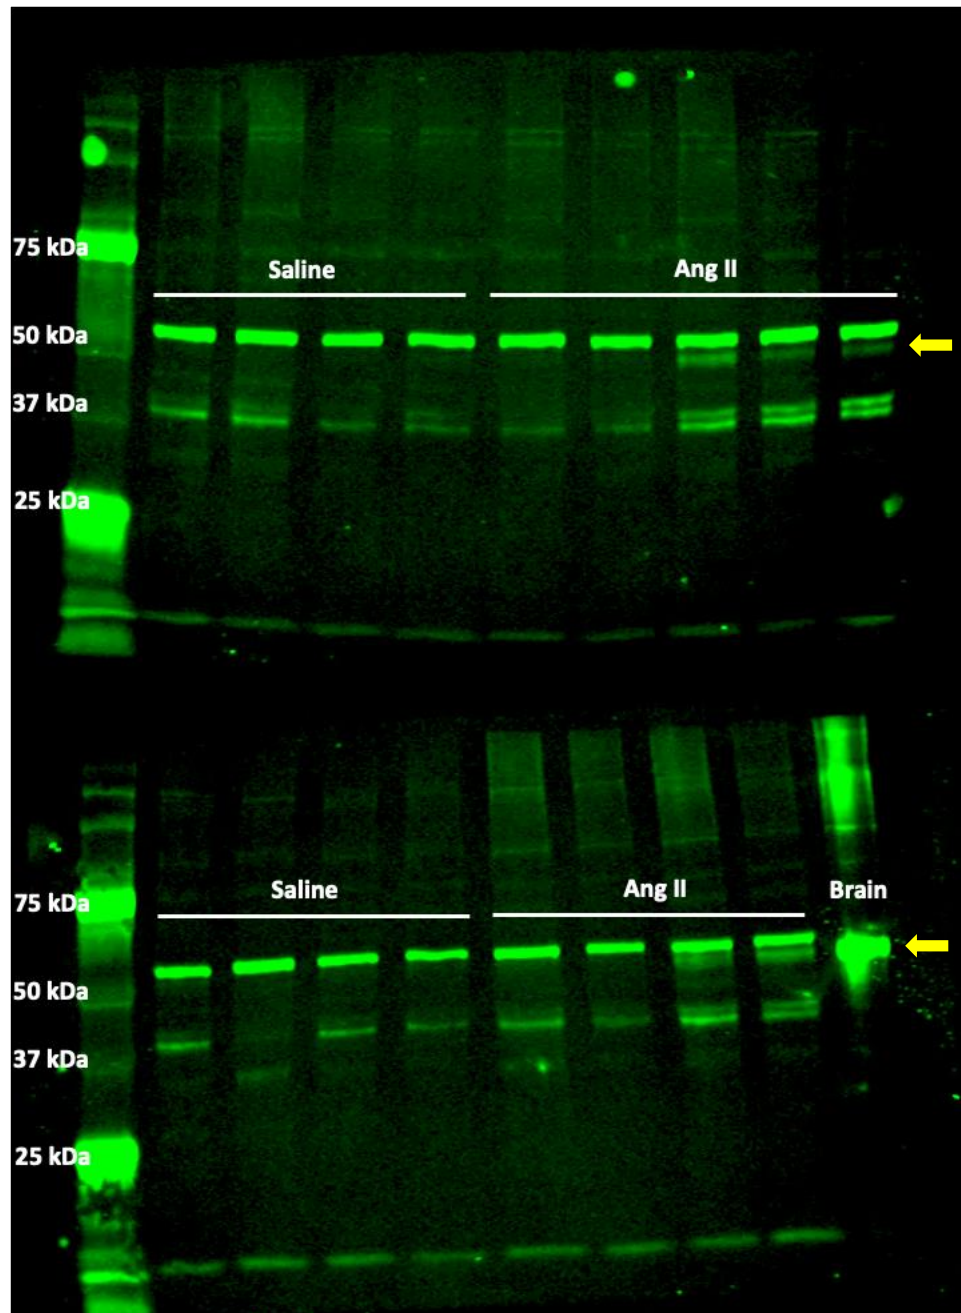

**Figure S4.** Image of full-length western blots for the H<sub>3</sub>R (yellow arrow) in LV lysate from saline and Ang II-infused mice that appears in cropped form in Figure 1C.

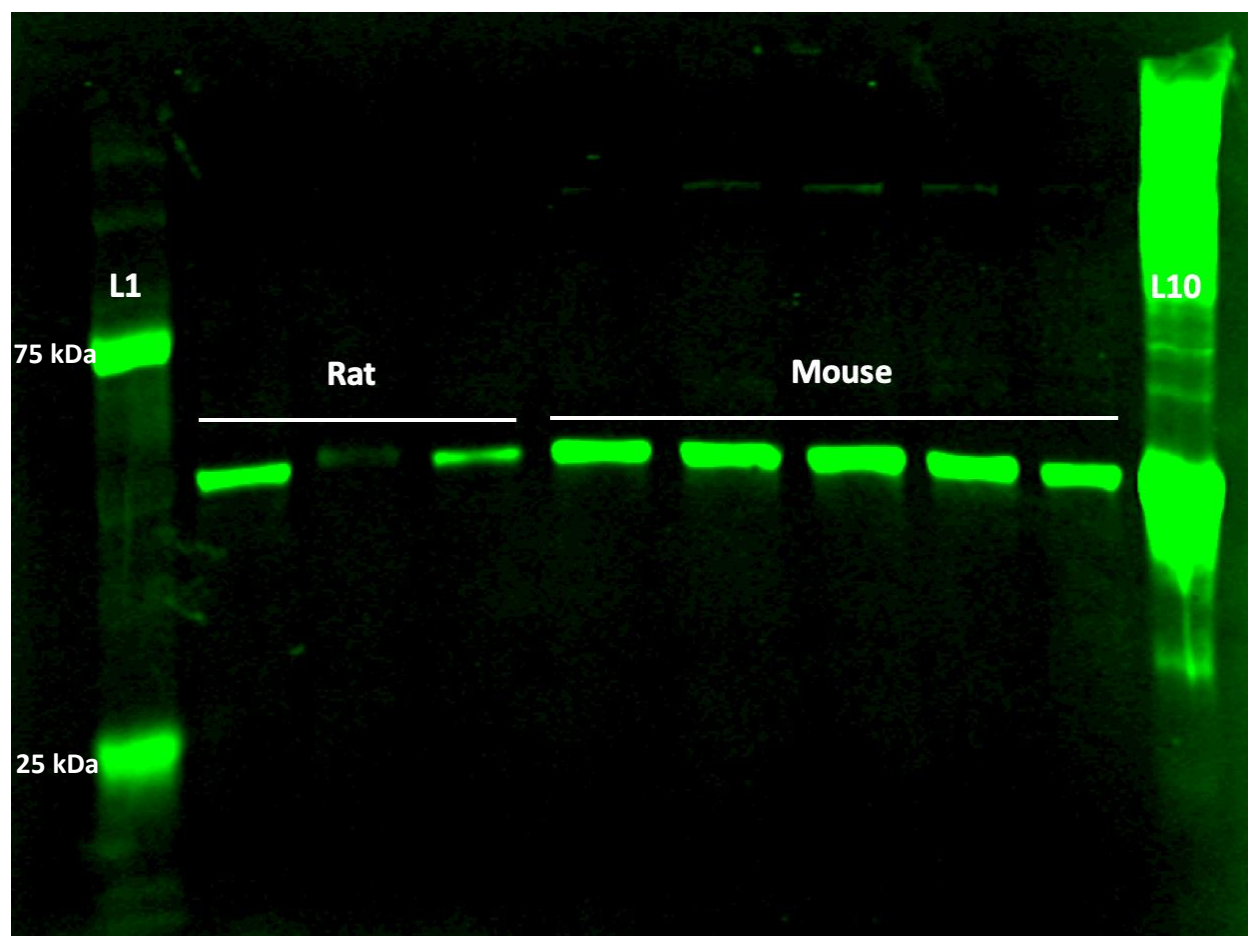

**Figure S5.** Image of full-length western blot for the H<sub>3</sub>R in protein lysate from isolated rat and mouse cardiac (myo)fibroblasts that appears in cropped form in Figure 2A. Lane 1 (L1) is the molecular weight ladder. Lane 10 (L10) is brain extract as a positive control for the H<sub>3</sub>R. Lane specifics are contained in the figure legend for Figure 2.

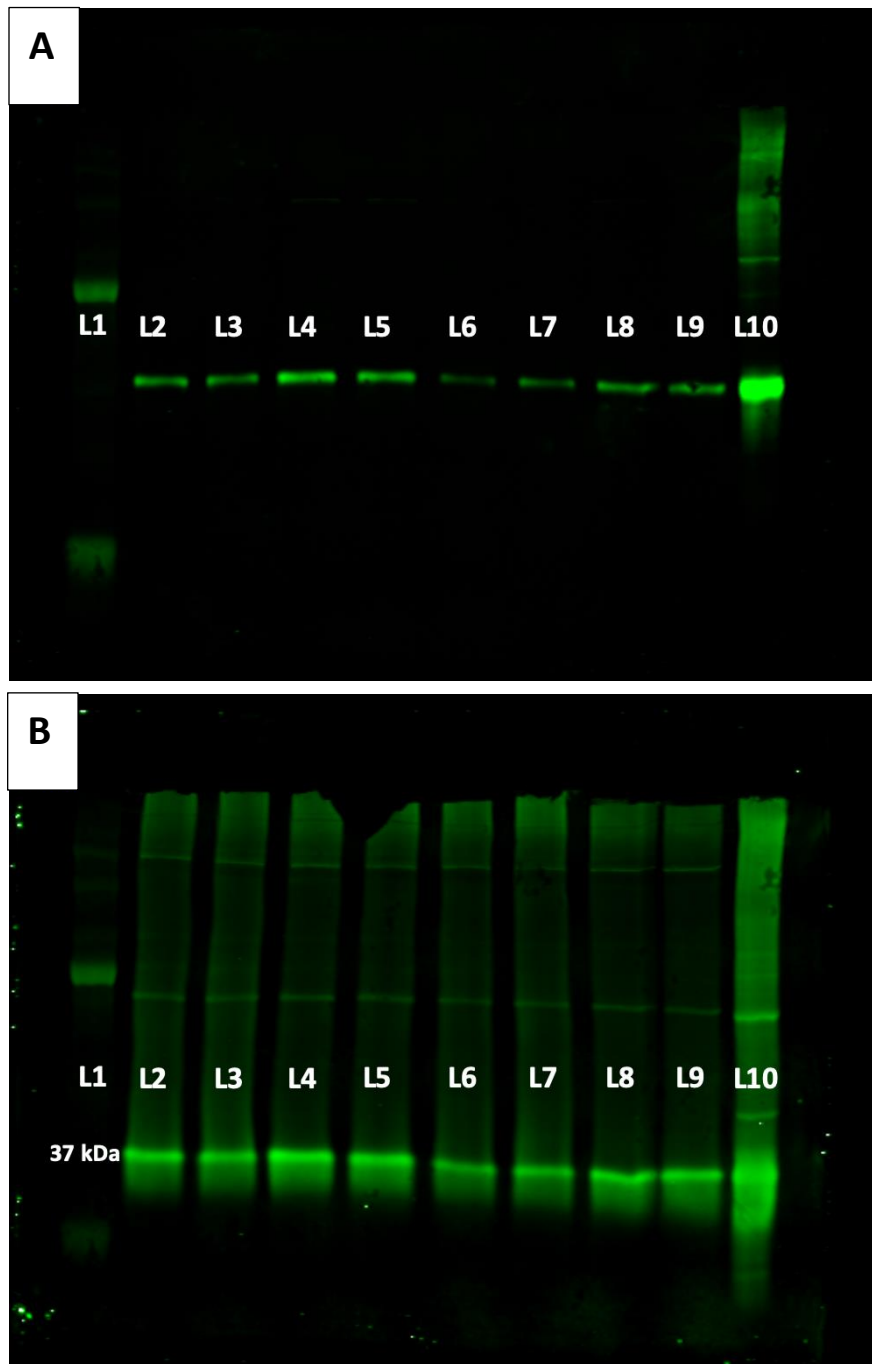

**Figure S6.** Images of full-length western blots for (A) the H<sub>3</sub>R and (B) GAPDH in control cardiac fibroblast and cardiac fibroblasts treated with Ang II (300 nM) that appears in cropped form in Figure 2B. Lane 1 (L1) = molecular weight ladder, L2/3 = control, L4/5 = Ang II treated, L6/7 = control, L8/9 = Ang II treated, L10 = brain extract as a positive control for H<sub>3</sub>R.



Saline

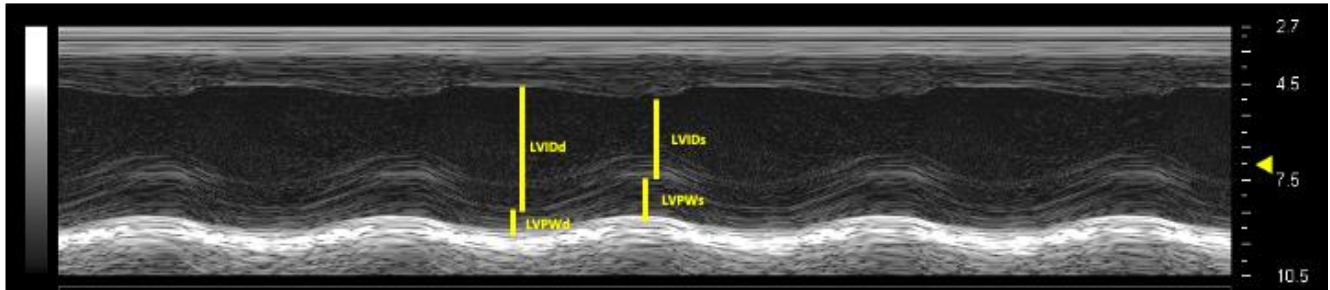

Ang II

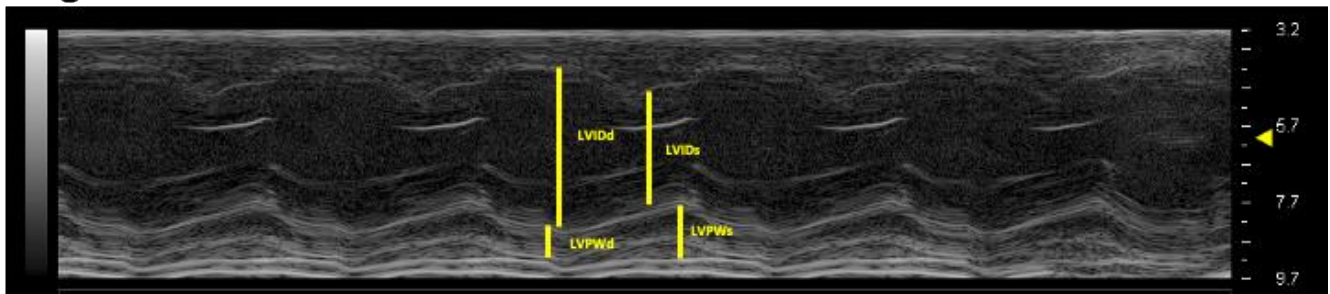

Ang II+A331440 (HD)

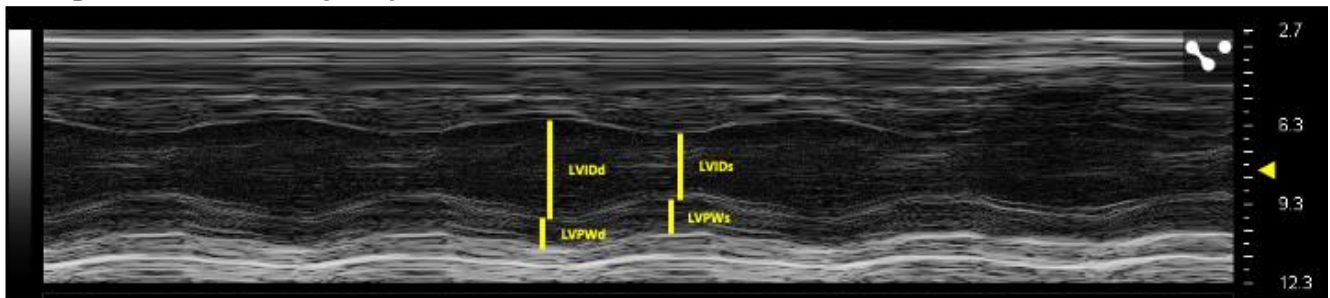

Ang II+Imetit (HD)

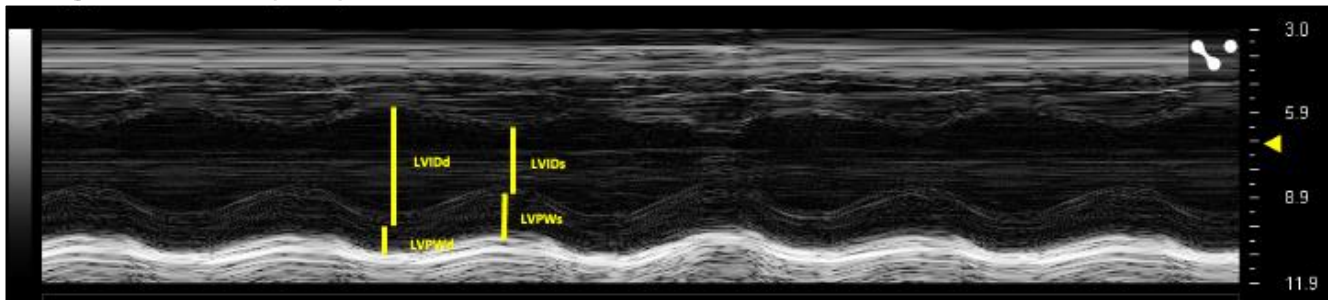

**Figure S7.** Example echocardiographic images for Saline, Ang II, Ang II+A331440 (HD) and Ang II+Imetit (HD) groups.

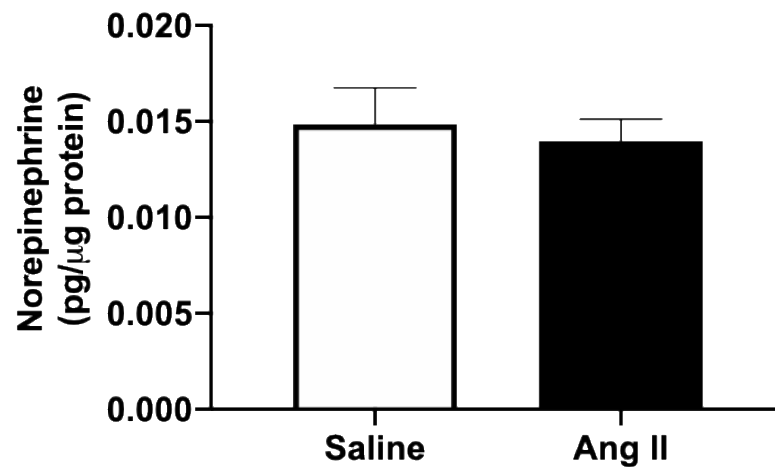

**Figure S8.** Norepinephrine levels from Saline and Ang II-infused mouse LV lysates. Data are mean  $\pm$  SEM.

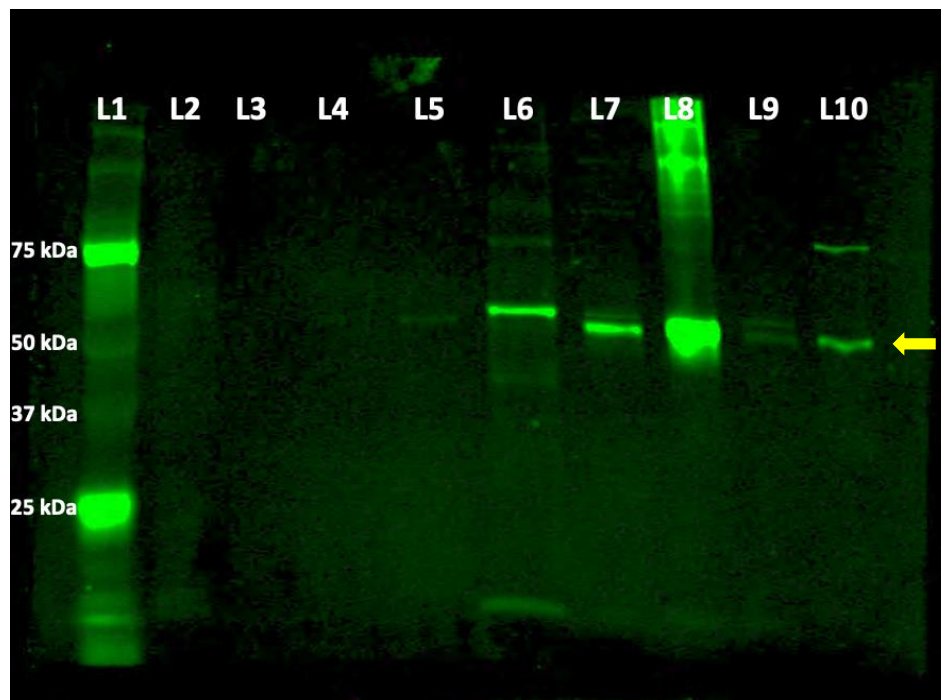

**Figure S9.** Western blot for the H<sub>3</sub>R (50 kDa, yellow arrow). L1 - Ladder, L2 - Bone marrow-derived mast cells, L3 - Bone marrow-derived macrophages, L4 - H9c2 cells (immature cardiomyocytes), L5 - Cardiac fibroblasts, L6 - LV, L7 - Lung, L8 - Brain, L9 - Thyroid, L10 - Thyroid cell line (NThy)

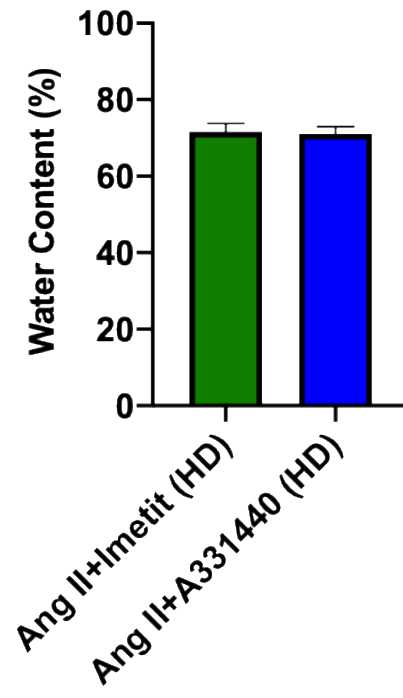

**Figure S10.** LV water content following Ang II-infusion for high dose (HD) Imetit and A331440 groups. Data are mean  $\pm$ SD.
